# Supplementary material for: Septins promote caspase activity and coordinate mitochondrial apoptosis
Source: PubMed Central journal article supplement (PMC10952901; doi:10.1002/cm.21696), 2022-05-09

# SUPPLEMENTARY FIGURE 1

## A

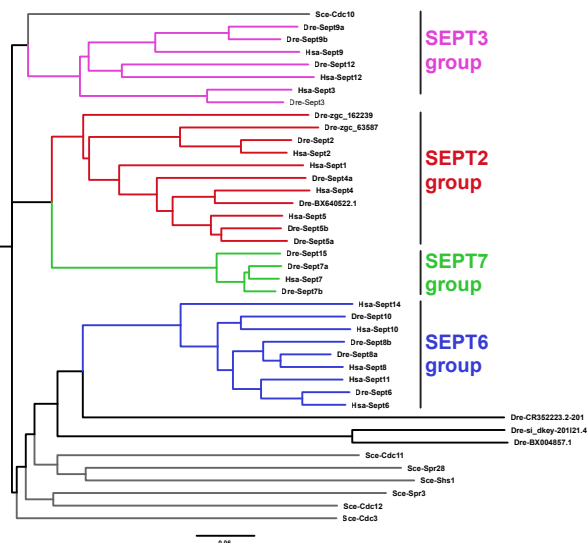

## B

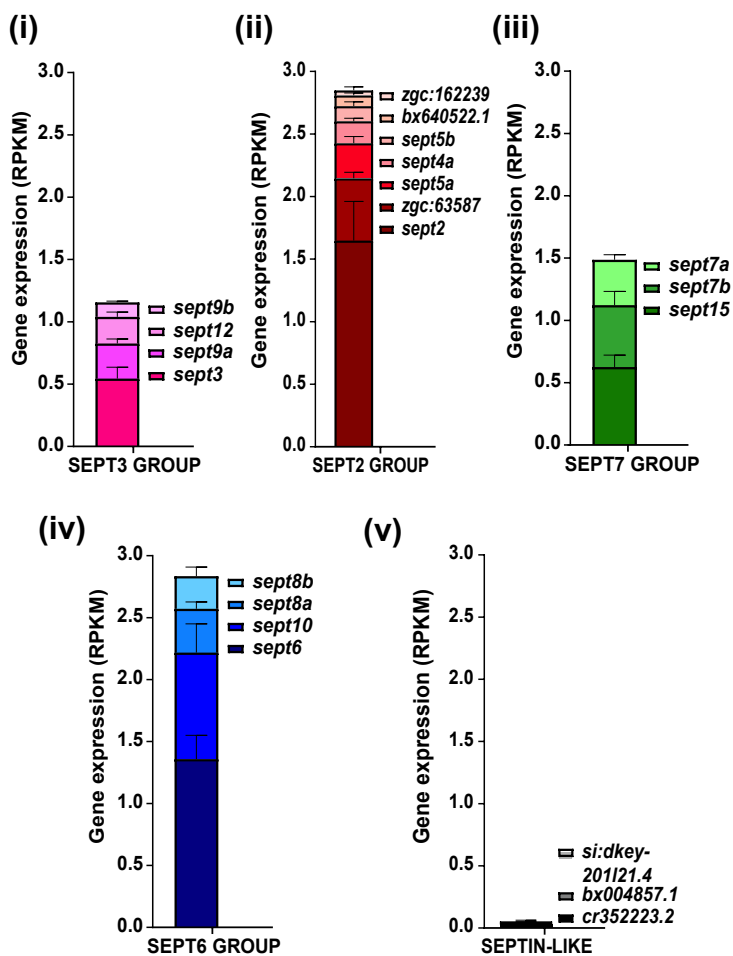

## C

### Target *Sept2.1AA*

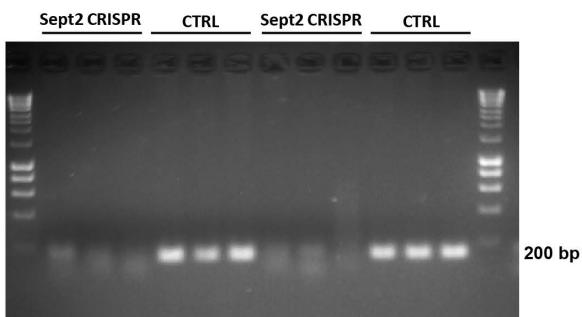

### Target *Sept2.1AB*

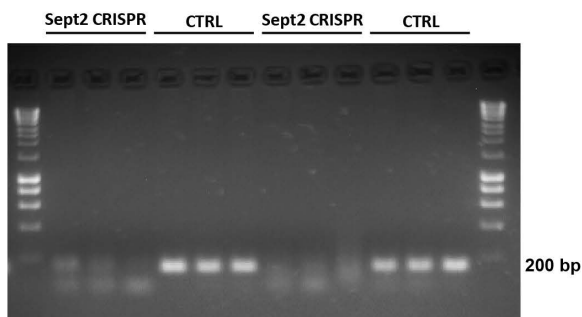

### Target *Sept2.1AC*

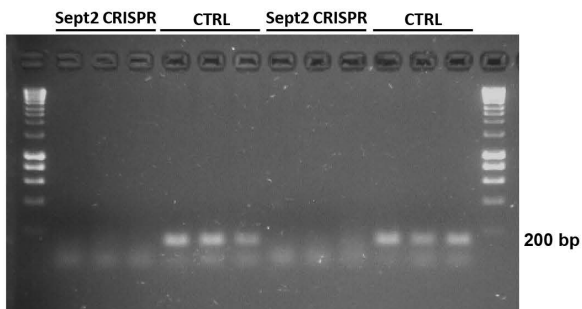

Supplement: CM-80-254-s002.pdf [file CM-80-254-s002.pdf]
